# Supplementary material
Source: publisher site journal article supplement (https://www.kjim.org/upload/media/kjim-2023-167-Supplementary-Table-2.pdf)
Supplement: Supplementary file 1 [file kjim-2023-167-Supplementary-Table-2.pdf]

**Supplementary Table 2. Univariate analysis to evaluate the histological features associated with disease progression in UC patients with mild endoscopic activity**

| Histologic feature                   | No disease progression | Disease progression | <i>p</i> value |
|--------------------------------------|------------------------|---------------------|----------------|
| Chronic inflammatory infiltration    | 1.59 ± 0.66            | 1.67 ± 0.49         | 0.662          |
| Neutrophils in the epithelium        | 0.50 ± 0.61            | 0.60 ± 0.63         | 0.556          |
| Acute inflammatory cell infiltrate   | 1.23 ± 0.76            | 1.33 ± 0.72         | 0.605          |
| Mucin depletion                      | 0.82 ± 0.74            | 0.73 ± 0.70         | 0.694          |
| Neutrophils in lamina propria        | 0.84 ± 0.72            | 1.20 ± 0.56         | 0.061          |
| Basal plasmacytosis                  | 0.00                   | 0.00                | -              |
| Serrated architectural abnormalities | 0.98 ± 0.91            | 1.80 ± 0.89         | 0.002          |
| Ulceration                           | 0.33 ± 0.47            | 0.80 ± 0.41         | 0.001          |

Values are presented as mean ± standard deviation.

UC, ulcerative colitis.
